# Supplementary material
Source: PubMed Central journal article supplement (PMC2783505)
Supplement: NIHMS150617-supplement-1_si_001.pdf [file NIHMS150617-supplement-1_si_001.pdf]

|        |     |                                                                                |
|--------|-----|--------------------------------------------------------------------------------|
| G2E6   | 1   | MAKLTALTL LGMGLALFDRQKSS FQTRFNHREVTPVELPNCNLVKGIDNGS <b>E</b> DLLEILPN        |
| HuPON1 | 1   | ----I-----RNHQ--Y--L-AL---Q-----ET---M-----                                    |
| G3C9   | 1   | -----L-----G-----V-----                                                        |
| G2E6   | 61  | GLAFISSGLKYPGIMSFDPDKSGKILLMDLNEKEPAVSELEIIGNTLDISSFNP <b>H</b> GISTF          |
| HuPON1 | 61  | -----K--N-NSP-----ED-T-L--G-T-SKF-V-----                                       |
| G3C9   | 61  | -----ED-V-L--G-T-----                                                          |
| G2E6   | 121 | IDDDNTVYLLVNVNHPGSSSTVEVFKFQEEEEKSLLHLKTI R HKLLPSV <b>N</b> DIVAVGPEHFYA      |
| HuPON1 | 121 | T-E--AM-----DAK---L-----NL-----G                                               |
| G3C9   | 121 | T-E-----D-----                                                                 |
| G2E6   | 181 | TNDHYFIDPYLKSWEMHLGLAWSFVTTYSPNDVRVVAEGFDF <b>A</b> NGINISPDGKYVYIAEL          |
| HuPON1 | 181 | -----L---Q---Y-----Y-V---SE-----                                               |
| G3C9   | 181 | -----A-----                                                                    |
| G2E6   | 241 | LAHKIHVYEKHANWTLTPLRVLSFDTLV <b>D</b> NISVDPVTGDLWVG <b>C</b> HPNGMRIFFYDAENPP |
| HuPON1 | 241 | -----KS-D-N---E-----K-----S---                                                 |
| G3C9   | 241 | -----KS-D-----Y--PK---                                                         |
| G2E6   | 301 | GSEVLRIQDILSEEPKVTVVYAENGTVLQGS <b>T</b> VAAVYK GKLLIG <b>T</b> VFHKALYCDL     |
| HuPON1 | 301 | A-----N--T---Q-----S-----E-                                                    |
| G3C9   | 301 | -----E-                                                                        |

Figure S1. Amino acid sequence alignment of G2E6, G3C9, and HuPON1. Protein sequences were aligned using CLUSTAL W (Larkin M.A., Blackshields G., Brown N.P., Chenna R., McGettigan P.A., McWilliam H., Valentin F., Wallace I.M., Wilm A., Lopez R., Thompson J.D., Gibson T.J. and Higgins D.G. (2007) ClustalW and ClustalX version 2. *Bioinformatics* 23, 2947-2948.) using G2E6 as the reference sequence. Amino acid residues that are conserved amino acids between G2E6 and either HuPON1 or G3C9 are indicated by ‘-’ symbol. Residues with atoms within 5 Å of the phosphate ion in the G2E6 crystal are highlighted in yellow.
